# Supplementary material for: 3D-Printed Metasurface Units for Potential Energy Harvesting Applications at the 2.4 GHz Frequency Band
Source: MDPI journal article supplement (doi:10.3390/cryst11091089), 2021-09-07
Supplement: s1 [file s1]

# 3D-Printed Metasurface Units for Potential Energy Harvesting Applications at the 2.4 GHz Frequency Band

Z. Viskadourakis <sup>1,\*</sup>, E. Tamiolakis <sup>2</sup>, O. Tsilipakos <sup>1</sup>, A. C. Tasolamprou <sup>1</sup>, E. N. Economou <sup>1,2</sup> and G. Kenanakis <sup>1,\*</sup>

<sup>1</sup> Institute of Electronic Structure and Laser (IESL), Foundation for Research & Technology–Hellas (FORTH), N. Plastira 100, Vassilika Vouton, GR-700 13 Heraklion, Greece; otsilipakos@iesl.forth.gr (O.T.); atasolam@iesl.forth.gr (A.C.T.); economou@admin.forth.gr (E.N.E.); gkenanak@iesl.forth.gr (G.K.).

<sup>2</sup> Physics Department, University of Crete, Vassilika Vouton, Heraklion GR-700 13 Heraklion, Greece; ph4284@edu.physics.uoc.gr (E.T.); economou@admin.forth.gr (E.N.E.)

\* Correspondence: zach@iesl.forth.gr (Z.V.); gkenanak@iesl.forth.gr (G.K.)

## Supplementary Material

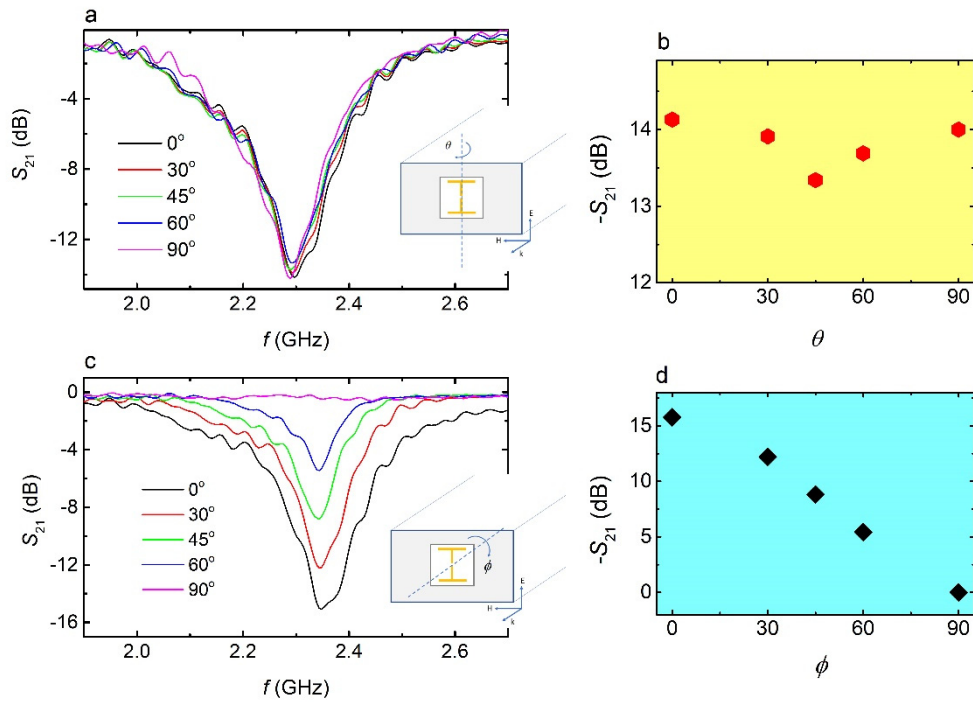

**Figure S1. Electromagnetic response of the FR-4 built MS, with respect to polarization angles.** (a)  $S_{21}$  vs.  $f$  for the FR-4 based MS for various angles  $\theta$ . The drawing shows the position of the MS unit with respect to the incident wave into the waveguide. (b) Maximum values of  $S_{21}$  as a function of  $\theta$ , as extracted from panel (a). The  $S_{21}$  value remains unaffected. (c)  $S_{21}$  vs.  $f$  for several angles  $\phi$ . The drawing shows the position of the MS unit with respect to the incident wave into the waveguide. (d) Maximum values of  $S_{21}$  as a function of  $\phi$ , as extracted from panel (c). The  $S_{21}$  value gradually decreases and it is eliminated, as the MS turns to  $\phi = 90^\circ$ .

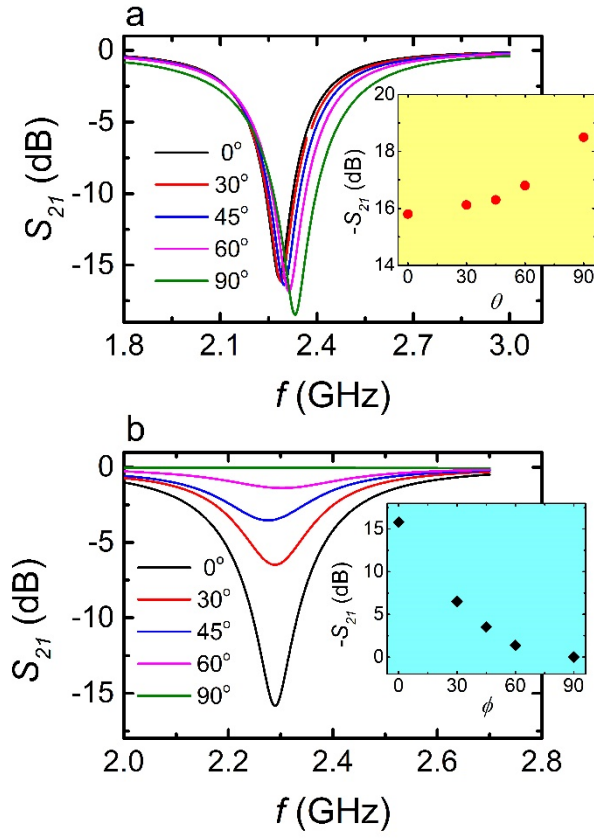

**Figure S2. Simulations for the FR-4 built MS, with respect to polarization angles.** (a) Simulation derived  $S_{21}$  vs.  $f$  for the FR-4 based MS for various angles  $\theta$ . **Yellow inset:** Maximum values of  $S_{21}$  as a function of  $\theta$ , as extracted from panel (a). The  $S_{21}$  value is slightly increased with the increasing angle. (b) Simulation derived  $S_{21}$  vs.  $f$  for several angles  $\phi$ . **Blue inset:** Maximum values of  $S_{21}$  as a function of  $\phi$ , as extracted from panel (b). The  $S_{21}$  value gradually decreases and it is eliminated, as the MS turns to  $\phi = 90^\circ$ .

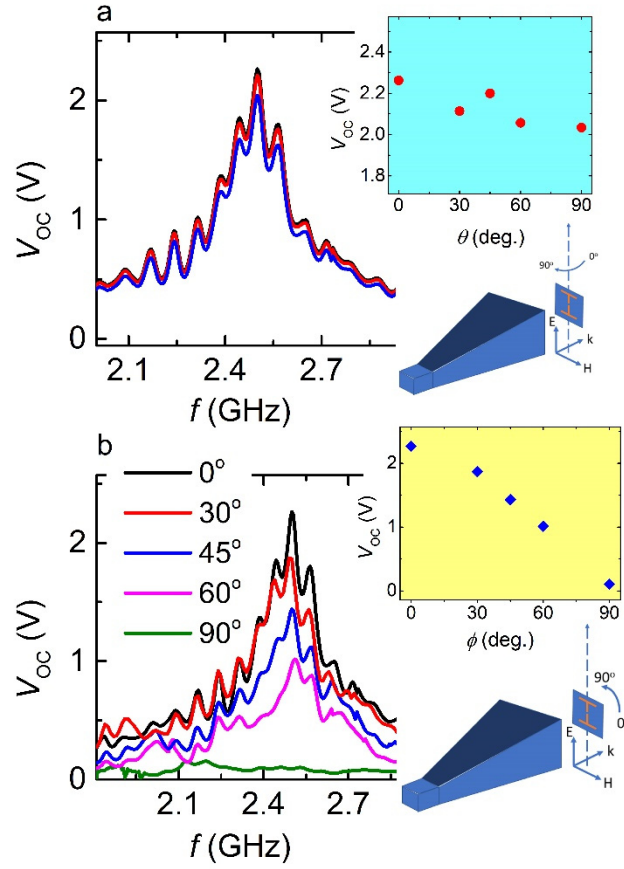

**Figure S3. Output voltage, with respect to polarization angles, for the Ag/PLA MS.** (a)  $V_{OC}$  vs.  $f$  for the Ag/PLA MS for angles  $\theta = 0$  (black line),  $\theta = 45^\circ$  (red line), and  $\theta = 90^\circ$  (blue line), respectively. **Blue inset:**  $V_{OC}$  vs. angle  $\theta$ . The drawing shows the position of the MS unit with respect to the horn. (b) Maximum values of  $S_{21}$  as a function of  $\theta$ , as extracted from panel (a). The  $S_{21}$  value remains unaffected. (c)  $V_{OC}$  vs.  $f$  for the Ag/PLA MS for angles  $\phi$ . **Yellow inset:**  $V_{OC}$  vs. angle  $\phi$ , as extracted from the main panel. The drawing shows the position of the MS unit with respect to the horn.
